# Supplementary material for: Anterior Scleral Thickness Profile in Keratoconus
Source: MDPI journal article supplement (doi:10.3390/life13112223), 2023-11-19
Supplement: s1 [file s1]

Table S1 and Table S2 illustrated the results of intraobserver variability in healthy and KC eyes, respectively, as supplementary data.

**Table S1.** Repeatability assessment between sessions for AST measurements in healthy eyes.

| Meridian | Eccentricity | Mean $\pm$ SD ( $\mu\text{m}$ ) | ICC  | Sw    | CoV  | p-value† |
|----------|--------------|---------------------------------|------|-------|------|----------|
| Nasal    | AST1         | 525 $\pm$ 51                    | 0.99 | 21.30 | 0.04 | 0.001*** |
|          | AST2         | 531 $\pm$ 58                    | 0.99 | 23.17 | 0.04 | 0.001*** |
|          | AST3         | 532 $\pm$ 65                    | 0.98 | 18.42 | 0.03 | 0.001*** |
| Temporal | AST1         | 522 $\pm$ 65                    | 0.99 | 30.52 | 0.06 | 0.001*** |
|          | AST2         | 497 $\pm$ 63                    | 0.98 | 20.24 | 0.04 | 0.001*** |
|          | AST3         | 513 $\pm$ 71                    | 0.98 | 26.13 | 0.05 | 0.001*** |
| Superior | AST1         | 457 $\pm$ 43                    | 0.97 | 21.02 | 0.04 | 0.001*** |
|          | AST2         | 448 $\pm$ 48                    | 0.97 | 16.60 | 0.03 | 0.001*** |
|          | AST3         | 453 $\pm$ 53                    | 0.99 | 26.5  | 0.05 | 0.001*** |
| Inferior | AST1         | 587 $\pm$ 53                    | 0.99 | 28.90 | 0.05 | 0.001*** |
|          | AST2         | 578 $\pm$ 57                    | 0.98 | 31.85 | 0.05 | 0.001*** |
|          | AST3         | 580 $\pm$ 59                    | 0.99 | 34.25 | 0.06 | 0.001*** |

\*\*\*p<0.001; † p-value ICC, two-way mixed absolute agreement individual measurements.  
 AST: anterior scleral thickness, SD: standard deviation, ICC: Intraclass Correlation Index, Sw: within-subject standard deviation, CoV: coefficient of variation

**Table S2.** Repeatability assessment between sessions for AST measurements in KC eyes.

| Meridian | Eccentricity | Mean $\pm$ SD ( $\mu\text{m}$ ) | ICC  | Sw    | CoV  | p-value <sup>†</sup> |
|----------|--------------|---------------------------------|------|-------|------|----------------------|
| Nasal    | AST1         | 514 $\pm$ 61                    | 0.99 | 22.18 | 0.04 | 0.001***             |
|          | AST2         | 527 $\pm$ 58                    | 0.97 | 23.78 | 0.04 | 0.001***             |
|          | AST3         | 537 $\pm$ 71                    | 0.98 | 25.46 | 0.04 | 0.001***             |
| Temporal | AST1         | 538 $\pm$ 76                    | 0.97 | 25.22 | 0.05 | 0.001***             |
|          | AST2         | 518 $\pm$ 75                    | 0.99 | 21.21 | 0.04 | 0.001***             |
|          | AST3         | 537 $\pm$ 75                    | 0.99 | 26.31 | 0.05 | 0.001***             |
| Superior | AST1         | 473 $\pm$ 67                    | 0.98 | 66.77 | 0.14 | 0.001***             |
|          | AST2         | 468 $\pm$ 58                    | 0.96 | 51.15 | 0.11 | 0.001***             |
|          | AST3         | 472 $\pm$ 67                    | 0.97 | 58.65 | 0.12 | 0.001***             |
| Inferior | AST1         | 588 $\pm$ 74                    | 0.98 | 74.60 | 0.13 | 0.001***             |
|          | AST2         | 568 $\pm$ 64                    | 0.99 | 67.48 | 0.12 | 0.001***             |
|          | AST3         | 577 $\pm$ 77                    | 0.99 | 79.33 | 0.14 | 0.001***             |

\*\*\*p<0.001; <sup>†</sup> p-value ICC, two-way mixed absolute agreement individual measurements.

AST: anterior scleral thickness, SD: standard deviation, ICC: intraclass correlation coefficient, Sw: within-subject standard deviation, CoV: coefficient of variation
